# Supplementary material for: Randomised Controlled Trial Comparing Daily Versus Depot Vitamin D3 Therapy in 0–16-Year-Old Newly Settled Refugees in Western Australia Over a Period of 40 Weeks
Source: Nutrients. 2018 Mar 13;10(3):348. doi: 10.3390/nu10030348 (PMC5872766; doi:10.3390/nu10030348)
Supplement: Supplementary file 1 [file nutrients-10-00348-s001.xlsx]

## Sheet: Comparative studies
	Summary of paediatric published literature looking at oral depot and/or daily vitamin D therapy
Number	Study (publication year)	Location	Study Type	Depot (Y=Yes, - No)	Daily (Y = Yes, - = N)	Vitamin D deficiency as defined by 25(OH)D level (nmol/L) if an inclusion criteria	Study Population, age group	No.	Doses (G1- Group 1, G2 - Group 2, G3- Group 3), Vitamin D3 unless otherwise stated	Outcomes	Follow up (F/U) and duration	Results	Hypercalcaemia (HC), nephrocalcinosis, (NC) hypercalciuria (HCU) or hypervitaminosis (HV)	Surrounding factors/variables predicting outcome
1	Wadia (current study)	Perth, Australia	Randomised control trial	Y	Y	<78	Newly arrived refugees (5.5m-16y)	151	G1 -100,000IU or 200,000IU depot, G2 - 2,500IU or 5,000IU daily	25(OH)D, Calcium, PTH, ALP, Phosphate, dietary and sun exposure questionairre at each visit	8, 16, 24, 32 and 40 weeks.	After baseline, proportionally more participants had >50 nmol/L levels 25(OH)D in the daily group compared to depot group	HC n=1 in G2 , HV 1 (same patient with HC). Did not test NC or HCU.	Age, time, treatment group, calcium and sun exposure score - predictors of 25(OH)D levels. Dietary intake low in vitamin D.
2	Vijayakumar (2017) [46]	Kerala, India	Randomised control trial	Y	-	-	Rickets (1-5y)	50	G1- 600,000IU single, G2- 60,000IU weekly for 8 weeks. All calcium supplement 50mg/kg/day for one year	25(OH)D (n=20 at start and n=17 at end of treatment assessment), calcium, phosphorus, ALP and xray (1,6 and 12 months)	1,2,6,9 and 12 months	No difference in 25(OH)D between groups. Both groups comparable in clinical and radiological response.	No HC	Risk factors for vitamin D determined but variables predicting response to treatment not assessed.
3	Harnot (2017) [47]	Northern India	Randomised control trial	Y	-	<37.5	Rickets (3m to 3y)	60	G1 - 300,000IU or G2 - 600,000IU oral	Proportion of patients with hypercalcaemia/hypercalciuria at 7-10 days post therapy, 3-5d, 25-30 d and 25(OH)D sufficiency at day 25-30. All participants were asymptomatic	3-5d, 7-10d and 25-30d post therapy	Both groups achieved sufficiency at day 25-30d.	HC and/or HCU 18.5% (5/27) in G2 and 10.7% (3/28) in G1 group (p=0.47) at 7-10th day. Similar proportion at 25-30th day.	Not assessed
4	Huynh (2017) [58]	Melbourne, Australia	Randomised control trial	Y	Y	-	Healthy infants assigned to treatment due to risk factors	70	G1 - 400IU per day for 4 months, G2 - 50,000IU stat dose	Proportion of infant vitamin D replete (25(OH)D>50nmol/L), clinical features of VDD, hypercalcaemia, adherance	1-2 weeks, 3-4 months	Bolus 25(OH)D levels significantly higher than daily group at initial f/u but at 3-4 month reverse but both groups replete	G2 - HV n=2 at 3-4 month f/u, No HC	Poor adherance in the daily group and drop in the exclusive breast feeding rates (daily>bolus group)
5	Kocyigit (2017) [48]	Turkey	Retrospective	Y	-	<50	Children	64	G1 - 10,000IU/kg , G2- 300,000IU stat dose	calcium, phosphorus, PTH, ALP, spot urine calcium/Cr ratio and renal uss	2, 4 and 12 weeks	25(OH)D level significantly higher at 2 weeks post treatment for G1 but no difference seen at 4 and 12 weeks follow up between groups	No HC/HCU/NC	Not assessed
6	Talaat (2016) [57]	Saudi Arabia Latitude 21.43oN	Randomised control trial	Y	Y	<75	Healthy Children (2 to 18 year)	637	G1 -400IU daily , G2 - 45,000IU weekly for 2 months then 400IU, G3 -2000IU for 3 months then 400IU daily for 12 months	25(OH)D, PTH, Calcium Phosphate, calcium/Cr	4, 12months	All treatment regimens caused increase in 25(OH)D level. G2 and G3 significantly better at 4 months but only G3 continued to show increase levels at 12 months. Decline in 25(OH)D to levels <75nmol/L in G1 and 2 at 12 months	No HC	Baseline physical activity, sun exposure and outdoor activity uniform between groups but study excluded darkly pigmented children
7	Tan (2015) [53]	Perth, Australia	Randomised control trial	Y	Y	<78	0-16 years Aboriginal children	37	G1 -100,000IU or 200,000IU depot, G2 - 2,500IU or 5,000IU daily	25(OH)D, Calcium, ALP, sun exposure	4-6 months, 9-12months	Daily group had a greater increase than depot group.	Not reported	Not assessed
8	Shepherd (2015) [35]	Sydney, Australia	Retrospective	Y	-	<50	Inflammatory bowel disease patients	76	<3 years - 200,000IU, 3-12years 400,000IU, >12years - 600, 000IU	25(OH)D	1month, 3 month, 6 months	safe and effectively achieved and maintained 25(OH)D>50nmol/L over 6 months	No HC	Not assessed
9	Mittal (2014) [42]	Delhi, India	Randomised control trial	Y	-	<50	Children (6m-5y)	76	G1 - 300,000 IU, G2 - 600,000 IU	25(OH)D, Radiological recovery from rickets (at diagnosis and 12 weeks), Ca/Cr ratio (@12 weeks), Ca (@ 4 weeks), 25(OH)D, PTH, calcium, Phosporous and ALP a(@ 1 and 12 weeks)	1, 4 and 12 weeks.	Both regimens comparable in increasing 25(OH)D levels but not enough to normalise vitamin D status in majority of patients at 3 months in both groups	HC: G1 n=1 at 4 weeks, n=1 at 12 weeks and G2 n=1 at 4 weeks, n=2 at 12 weeks; HV and HCU: n=0	Not assessed
11	Garg (2013) [41]	Delhi, India	Prospective non randomised	Y	Y	Not an inclusion criteria but <50 in 94.8%	Adolescents (10-15 y)	482	G1 -60,000IU for 4, G2 - 60,000IU for 6 and G3 -60,000IU for 8 weeks followed by 600IU daily for 12 weeks	Serum calcium, phosphate, ALP, 25(OH)D and urine Ca:Cr at entry, end of high dose phase and end of study	4,6 or 8 week then end of 12 weeks of maintainance therapy	all groups are efficacious in increasing 25(OH)D levels but G3 is best for maintaining 25(OH)D >75nmol/L at the end of study	No HC, HV or HCU	Predictors of mean change in 25(OH)D: BMI and ALP negative correlation , Dose /kg/week positive correlation. Age, sex, baseline calcium, phosphate and 25(OH)D no correlation
12	Pappa (2012) [55]	Boston, USA	Randomised control trial	Y	Y	<50	Inflammatory bowel disease patients (5-21y)	71	G1 - 2000IU D2/day, G2 = 2000IU, G3- 50,000IU D2 depot	25(OH)D, PTH	6 weeks	Daily D3 and depot D2 dosing superior to daily D2 dosing. Well tolerated	No HC	Not assessed
13	Emel (2012) [51]	Istanbul, Turkey	Randomised control trial	Y	Y	<50	Children (5m - 3y)	42	G1 - 150,000IU stat, G2 -2000IU daily for 6 weeks and calcium lactate 50mg/kg/day for 2 weeks both groups	Calcium, phosphorous, ALP at 0, 1, 6 weeks ; PTH, 25(OH)D, Urine Ca/Cr 0 and 6 weeks, Renal USS 4 weeks	1, 4 and 6 weeks	25(OH)D level in low depot therapy significantly increased compared to daily high dose vitamin D treatment.	No HC,HCU or NC on treatment	Not assessed
10	Shakiba (2011) [43]	Yazd, Iran	Randomised control trial	Y	-	-	Junior high school girls (12-15 y)	102	G1 - Control -Vitamin E, G2 - 50,000IU and repeated 3m later, G3 - 100,000 IU and repeated 3m later	Urine Ca/Cr at 2weeks, 25(OH)D one month post second dose	4 months	Neither of the groups had 25(OH)D levels>50nmol/L. In G3 none had 25(OH)D levels<30nmol/L.	No HCU	Not assessed
14	Shakinba (2011) [59]	Yazd, Iran	Randomised control trial	Y	-	-	Junior high school girls (12-15y)	120	G1 - 300,000 IU + 50,000IU monthly for 3 months (~2000IU daily) G2 - 300,000 IU + 10000IU/3 months (~1000IU daily) G3 - 50,000IU/3months (~400IU daily) G4 - 100,000IU/3months ( ~1000IU daily)	25(OH)D	4 months	In areas of high risk, the recommended 400IU/day or 800IU/day doses are inadequate. Treating for deficiency and higher daily doses maintains 25(OH)D >50nmol./L	Not reported	Not assessed
15	Marwaha (2010) [49]	Delhi, India	Randomised control trial	Y	-	Not an inclusion criteria but <50 in 93.7%	Healthy school girls (6-17y)	290	G1 - 60,000IU two monthly x 6 doses; G2 - 60,000IU monthly x12 doses. Further classification according to socioeconomic status(SES)	Serum 25(OH)D, calcium, phosphorus, PTH, and ALP levels at 6 and 12 months after start of supplementation.	6 and 12 months	Both regimens comparable in increasing 25(OH)D levels	Not reported	Not assessed
16	Gordon (2008) [56]	Boston, USA	Randomised control trial	Y	Y	<50	8-24months	40	G1 -2000IU daily D2, G2 -50,000IU weekly or G3 -2000IU D3 daily and 50mg/kg/day of elemental calcium	25(OH)D, PTH, Calcium, ALP, phosphorus, magnesium (pre and post)	6 weeks	No difference in the three groups.	No HC	Not assessed
17	Tau (2007) [38]	Tierra Del Fuego, Argentina	Prospective	Y	-	-	Healthy children	18	2 doses of 100,000 IU 3m apart	25(OH)D (0,1,~6 months), Calcium, phosphate and ALP (4 and ~6 months)	1, ~6 months	No child insufficient or deficient on vitamin D therapy. Supplementation for children at zones of risk prevents vitamin D deficiency	No HC or HV	Not assessed
18	Akcam (2006) [50]	Turkey	Prospective	Y	-	<35	Rickets (5-13m)	20	G1 -600,000IU; G2- 20,000IU/day for 30 days	25(OH)D (start only), Ca, Phosphate, ALP, BMD lumbar spine L2-L4 (pre and post treatment)	30 days	Both regimens increase BMD from baseline. Similar between groups.	No HC	Not assessed
19	Cesur (2003) [45]	Van, Turkey	Randomised control trial	Y	-	-	Rickets (3-36 months)	76	G1 - 150,000 IU, G2 - 300,000 IU, G3 -600,000 IU. All had calcium supplements. Control	PTH and 25(OH)D (start), Calcium, Phosphorus, ALP (start, 7-10th and 25-30th day) Urinary Ca/Cr ratio (3rd, 7-10th day), Wrist Xray (start and 25-30th day).	3, 7-10 and 25-30 days after treatment. 60th day - those who did not respond	No difference in improvement betweeen the two groups.	HC 2/20 in G2 and 6/16 in G3	Not assessed
20	Guillemant (2001) [60]	Gouvieux, France, latitude 49oN	Randomised control trial	Y	-	-	Healthy males (13-16y)	54	100,000IU depot every two months (3 doses total)	25(OH)D iPTH	Part 1) 18 month initial follow up to assess 25(OH)D Part 2)2, 4, 6 and 8 months	Part 1) Higher 25(OH)D levels in summer. In winter months, higher proportion of students had 25(OH)D levels <25nmol/L. Part 2) Vitamin D treated students maintained similar 25(OH)D and iPTH levels as seen in summer during winter. Those not treated had declining 25(OH)D levesl with increasing iPTH levels.	No HC or HV	Not assessed
21	Zeghoud (1994) [44]	Paris, France and Constantine, Algeria	Prospective	Y	-	Not an inclusion criteria but <25 in all	Healthy newborns	60	G1 - 1984-85 = 600,000IU (n-30), 1991-1992 randomly assigned G2=200,000IU at birth or G3 = 100,000IU at birth, 3 and 6 months (n=30)	25(OH)D, calcium, phosphorus	0 to 6-9months	G1 = 93% > 25(OH)D 120umol/L at 2 weeks post dose, persisted in 50% at 6 months. Oral doses of 100,000IU every 3 months provides best response.	No HC, HV in G2 and G3	Not assessed
22	Shah (1994) [36]	New York, USA	Prospective	Y	-	<25	Rickets (5m - 109m)	40	G1 -600,000IU D2 (6 doses of 100,000/2 hrs over 12 hrs) 300,000IU D2 for children with evidence of healing rickets (n=2). All received 400IU D2/day after 3 months.	calcium and phoshpate measured 4-7 days; xray 10-14 days after ALP measured monthly until normal	4-7days, 10-14 days and monthly	Depot therapy is safe and improves biochemical and radiological changes	No HC	Not assessed
23	Markestad (1987) [61]	Germany	Prospective	Y	-	<20nmol/L (5/9 at one month)	Healthy Infants (1-20months)	43	600,000IU D2 every 3-5 months during the first 1-2 years of life	Calcium, phosphate and Vitamin D metabolites including 25(OH)D	pre and 2 weeks post treatment	Increase in 25(OH)D was significant post dose. Predose levels subsequently >20nmol/L	14 treated infants had HC (34%), no HV	Not assessed
24	Raghuramulu (1981) [52]	Hyderabad, India	Prospective non randomised	Y	Y	-	Malnuourished and healthy (1-5 years)	37	G1 - 600,000 IU stat, G2- 2000IU daily for 20days	25(OH)D, phosphorus, ALP, Calcium, total protein, albumin and binding capacity of serum to 25(OH)D	10th and 20th day	Basal serum 25(OH)D significantly lower in malnourished than normal children. Both depot and daily resulted in increases, depot higher magnitude	Not reported	Vitamin D metabolism not altered by protein malnourishment
